# Supplementary material
Source: PubMed Central journal article supplement (PMC11028837)

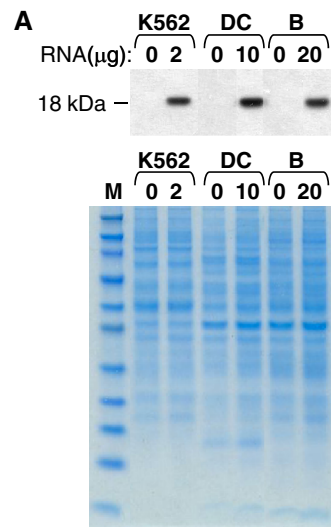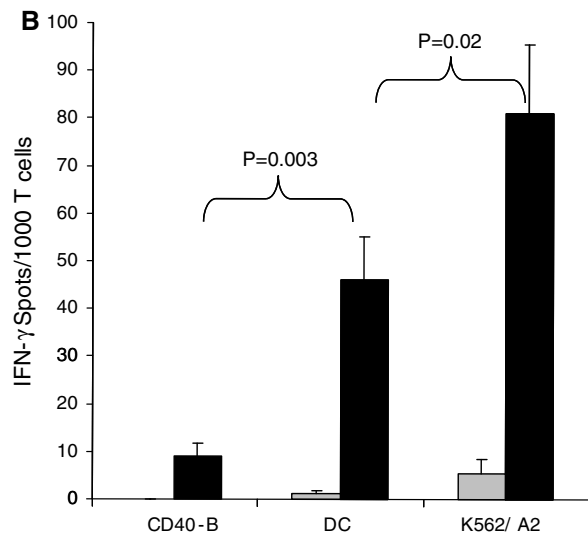

Supplement: 262_2011_995_MOESM1_ESM.pdf [file 262_2011_995_MOESM1_ESM.pdf]

Melan A mRNA

Mart1 peptide

DC {  
+None  
+Lactacystin  
+MG-132

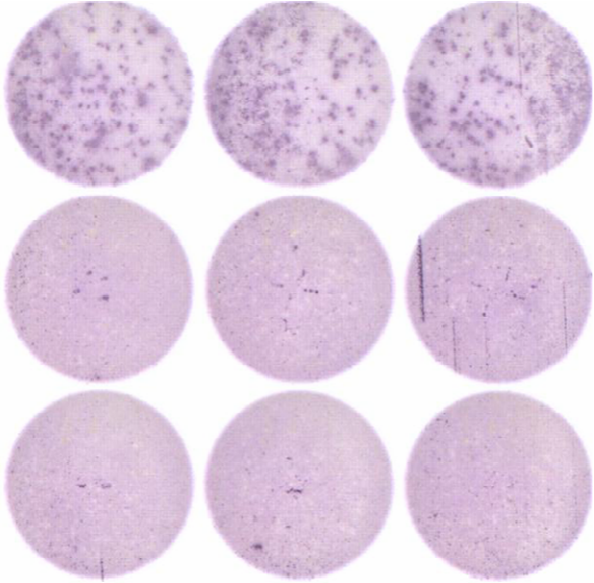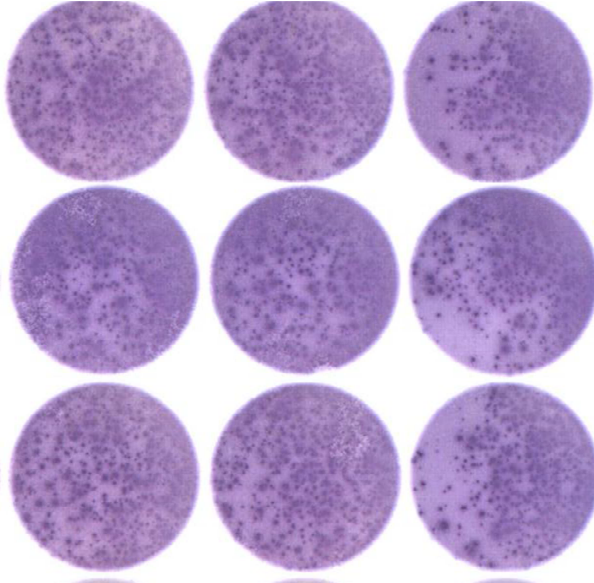

K562 {  
+None  
+Lactacystin  
+MG-132

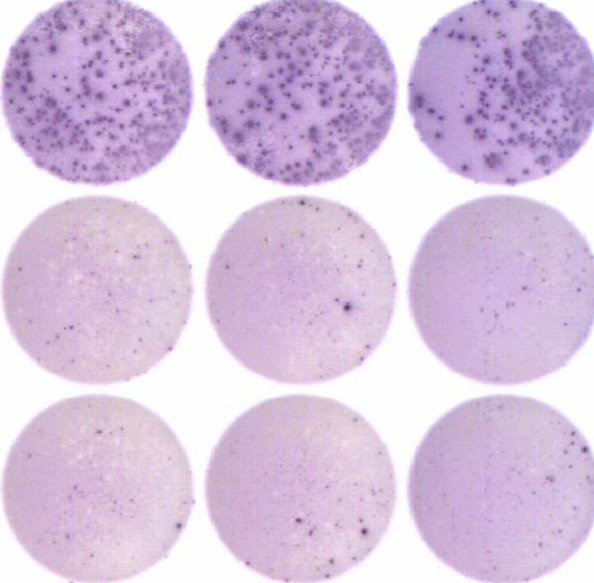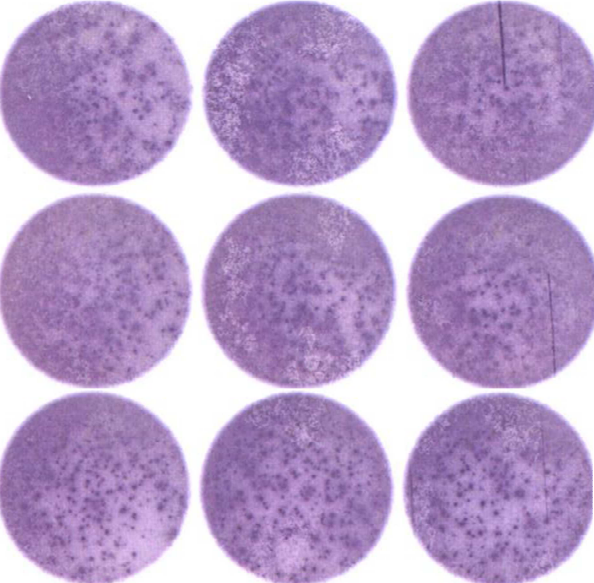

Supplement: 262_2011_995_MOESM2_ESM.pdf [file 262_2011_995_MOESM2_ESM.pdf]
